# Supplementary material for: A floating photocatalytic fabric integrated with a AgI/UiO-66-NH2 heterojunction as a facile strategy for wastewater treatment
Source: Royal Society of Chemistry journal article supplement (doi:10.1039/d3ra07534f), 2024-01-01
Supplement: d3ra07534f1.pdf [file d3ra07534f1.pdf]

Supporting Information

A floating photocatalytic fabric integrated with AgI/UiO-66-  
NH<sub>2</sub> heterojunction as a facile strategy of wastewater treatment

*Jaeseon Yoo,<sup>†</sup> Jinwook Lee,<sup>†</sup> and Jooyoun Kim<sup>\*, †, §</sup>*

<sup>†</sup>Department of Fashion and Textiles, Seoul National University, Seoul 08826, Republic of Korea

<sup>§</sup>Research Institute of Human Ecology, Seoul National University, Seoul 08826, Republic of Korea

\* Correspondence to: [jkim256@snu.ac.kr](mailto:jkim256@snu.ac.kr)

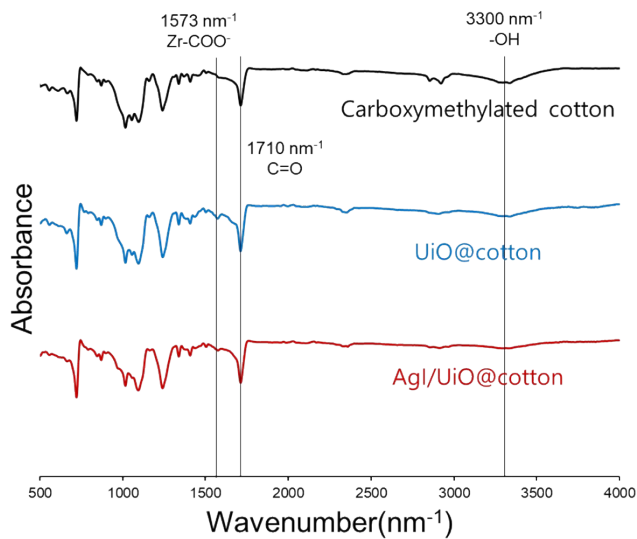

**Fig. S1** Fourier-Transform Infrared spectroscopy (FT-IR) analysis of carboxymethylated cotton, UiO@ cotton and AgI/UiO@ cotton.

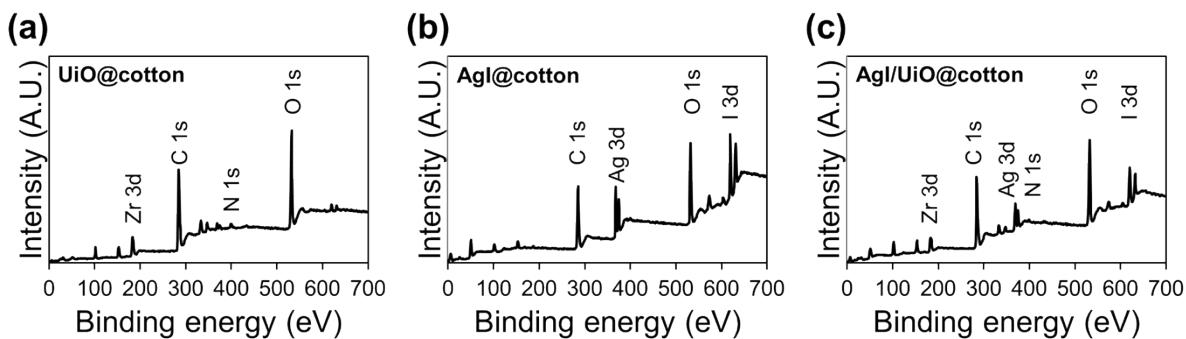

**Fig. S2** Wide scan XPS spectra of (a) UiO@ cotton, (b) AgI@ cotton, and (c) AgI/UiO@ cotton.

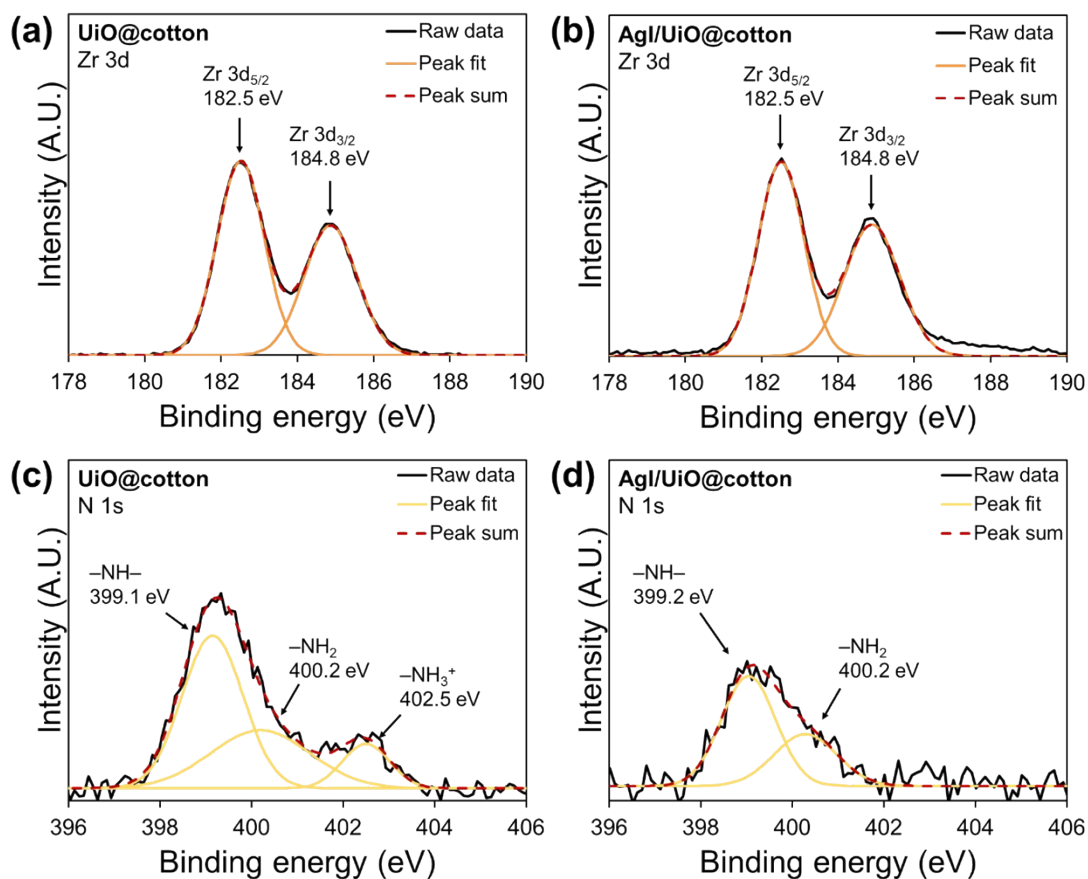

**Fig. S3** High resolution XPS spectra of (a) Zr 3d of UiO@cotton, (b) Zr 3d of AgI/UiO@cotton, (c) N 1s of UiO@cotton and (d) N 1s of AgI/UiO@cotton.

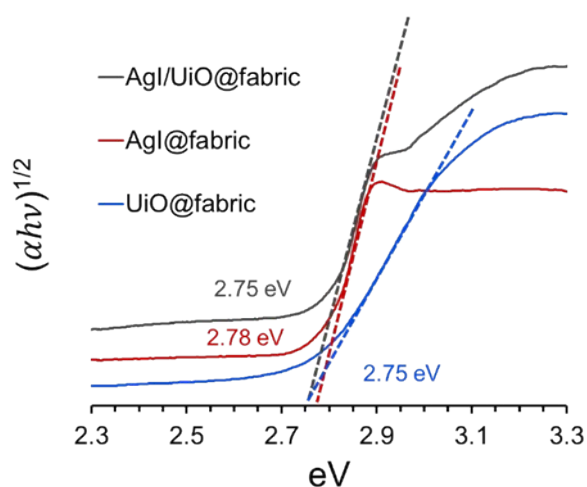

**Fig. S4** Band gap energy ( $E_g$ ) estimation by Kubelka-Munk equation from DRS spectra.

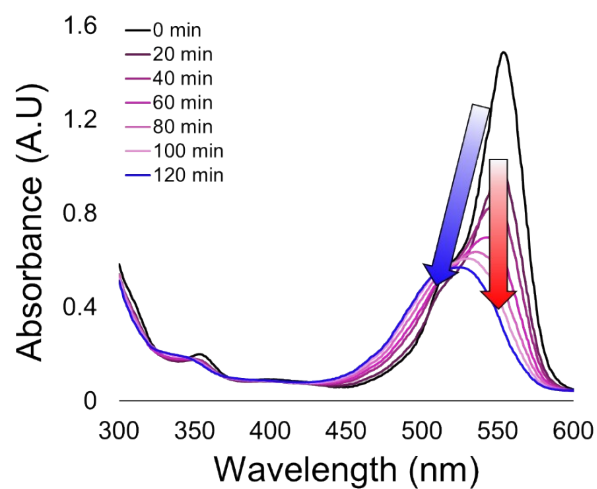

**Fig. S5** Changes of UV-vis absorbance of Rhodamine B with AgI@fabric.

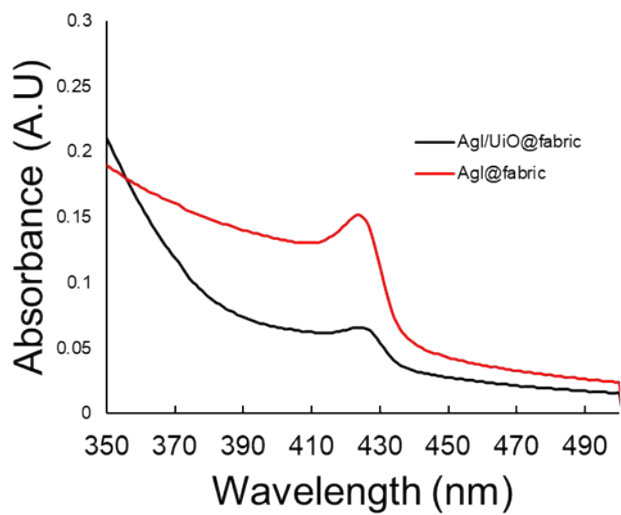

**Fig. S6** UV-vis absorbance spectra of distilled water after 2 hr of irradiation with AgI@fabric and AgI/UiO@fabric
